# Supplementary material
Source: Springer Nature journal article supplement (https://www.springermedizin.de/resource/supplementary/12875_2011_715_MOESM3_ESM.pdf/9435270)

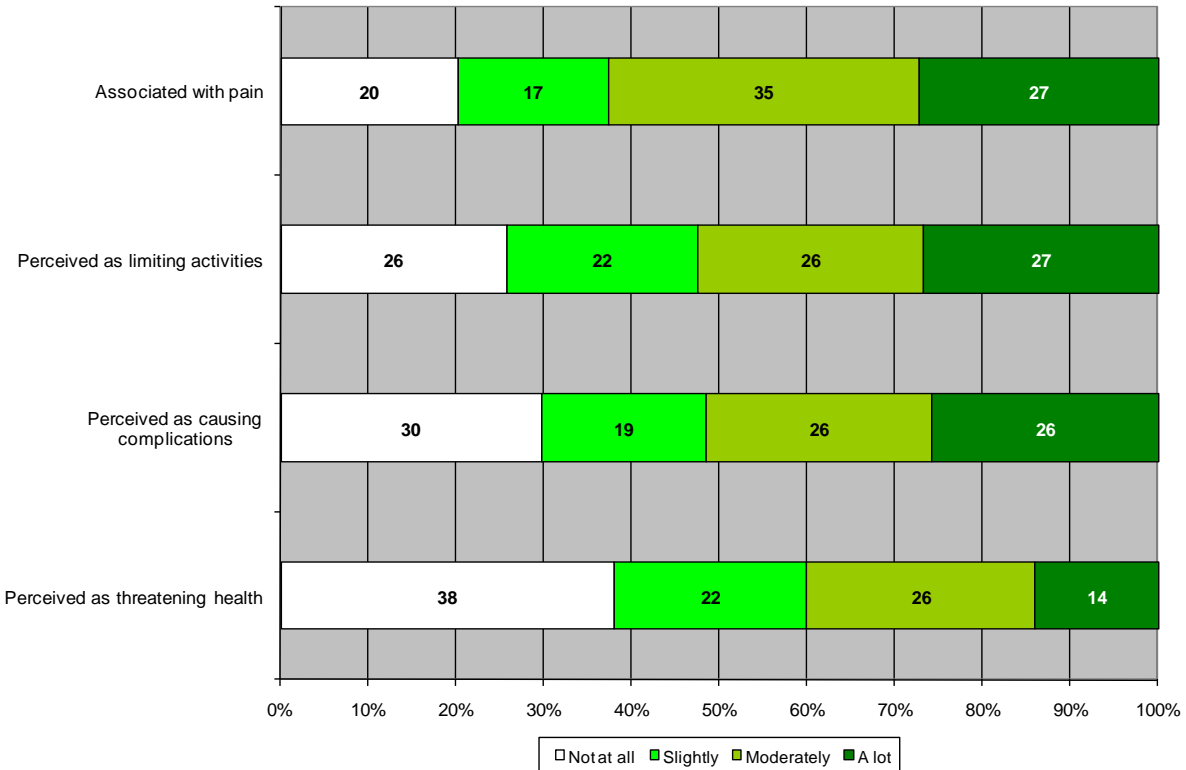

Supplement: MOESM3 [file 9435270]
